# Supplementary material for: SSR Linkage Maps and Identification of QTL Controlling Morpho-Phenological Traits in Two Iranian Wheat RIL Populations
Source: MDPI journal article supplement (doi:10.3390/biotech11030032), 2022-08-08
Supplement: s1 [file s1]

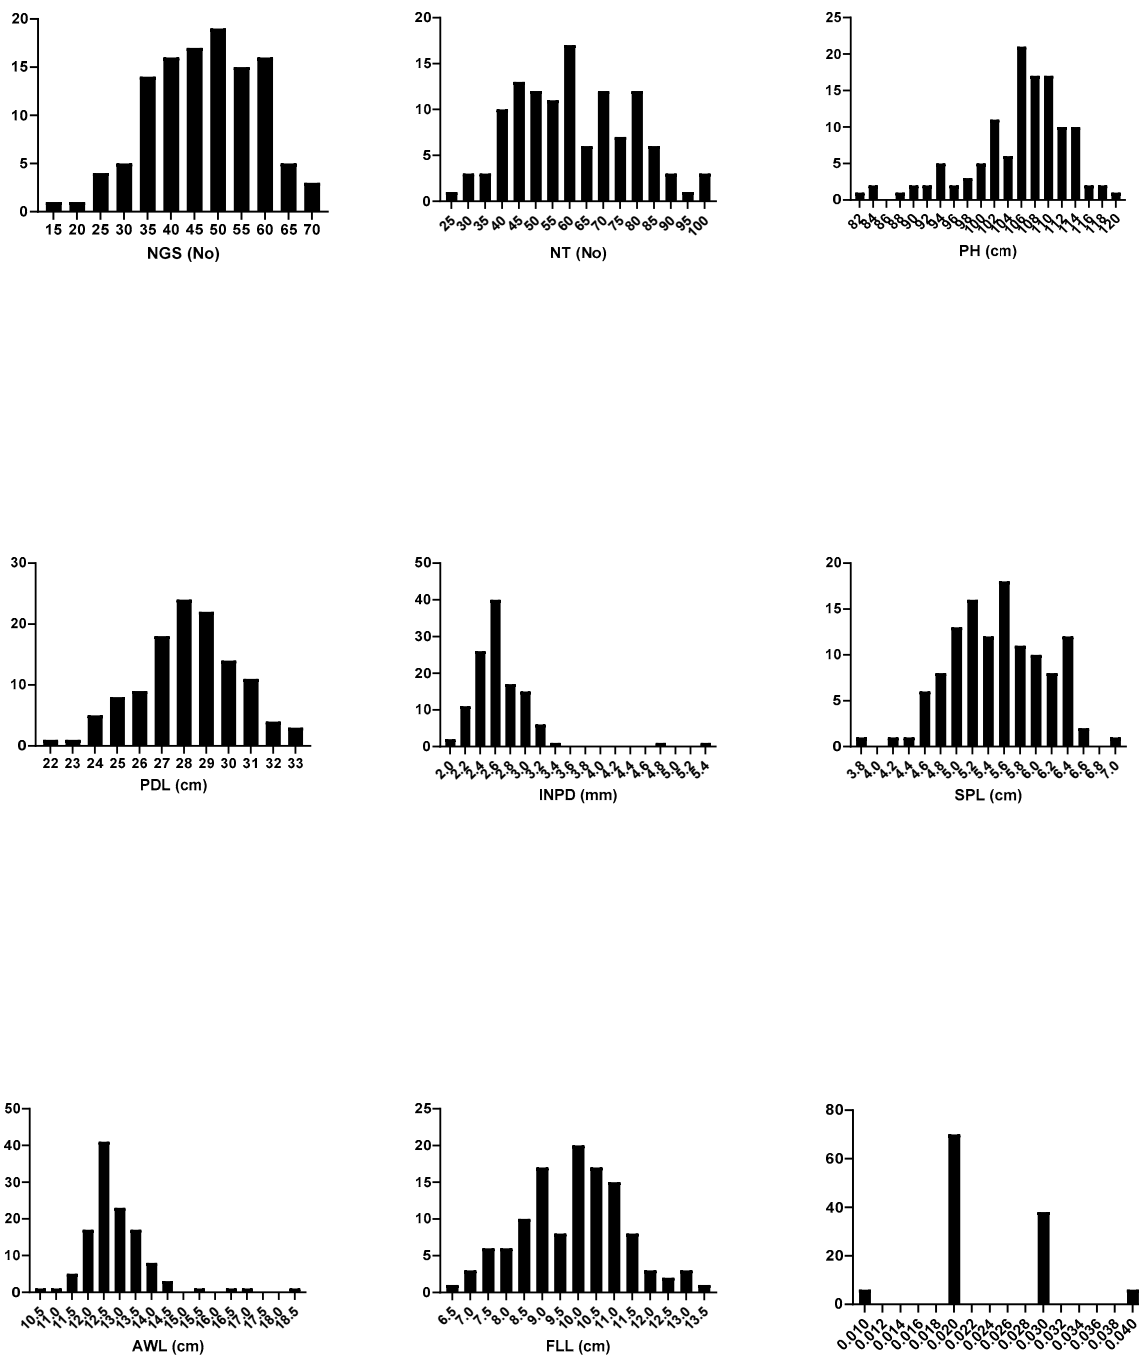

Figure S1. Frequency distribution of observed values of studied traits in F8 lines of wheat obtained from Gonbad  $\times$  Zagros in 2020

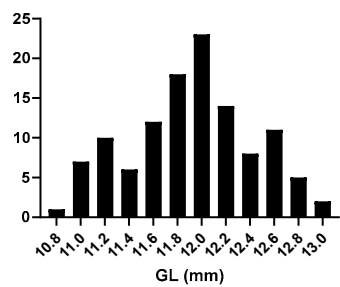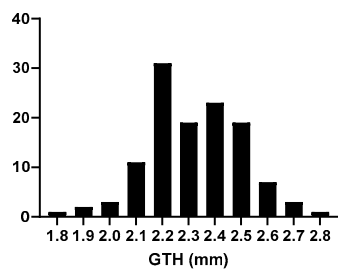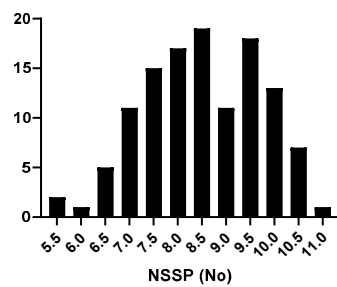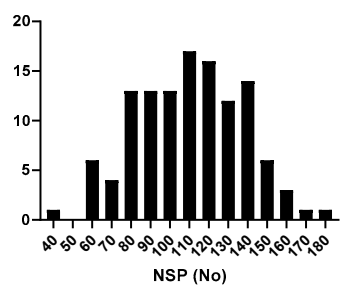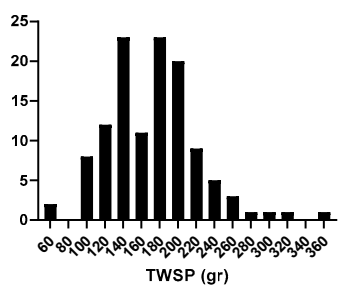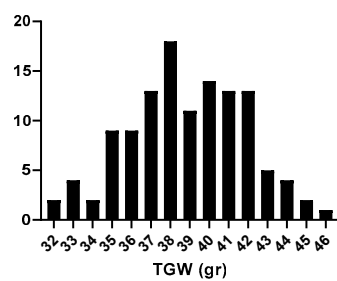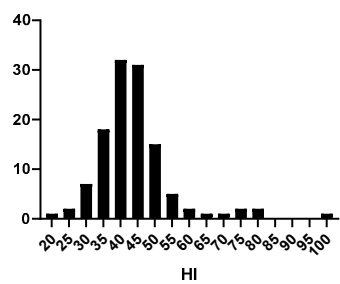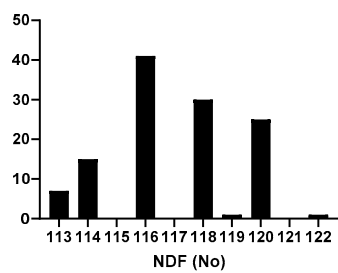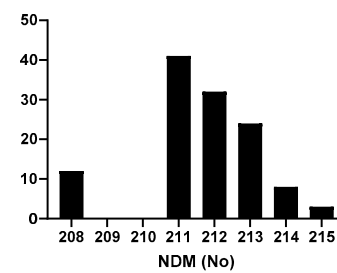

Continue Figure S1.

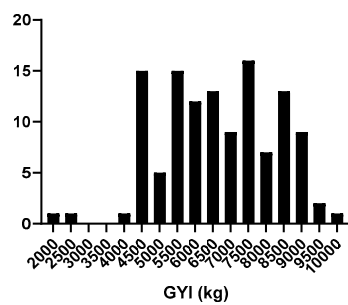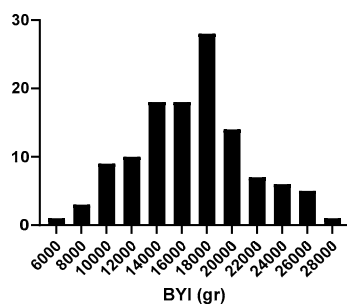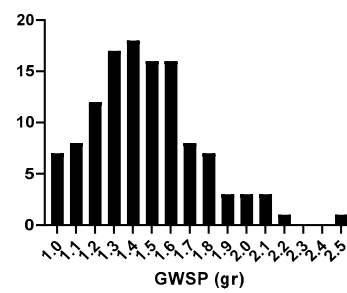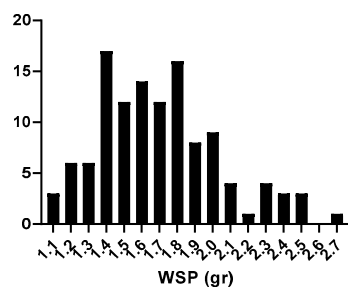

Continue Figure S1.

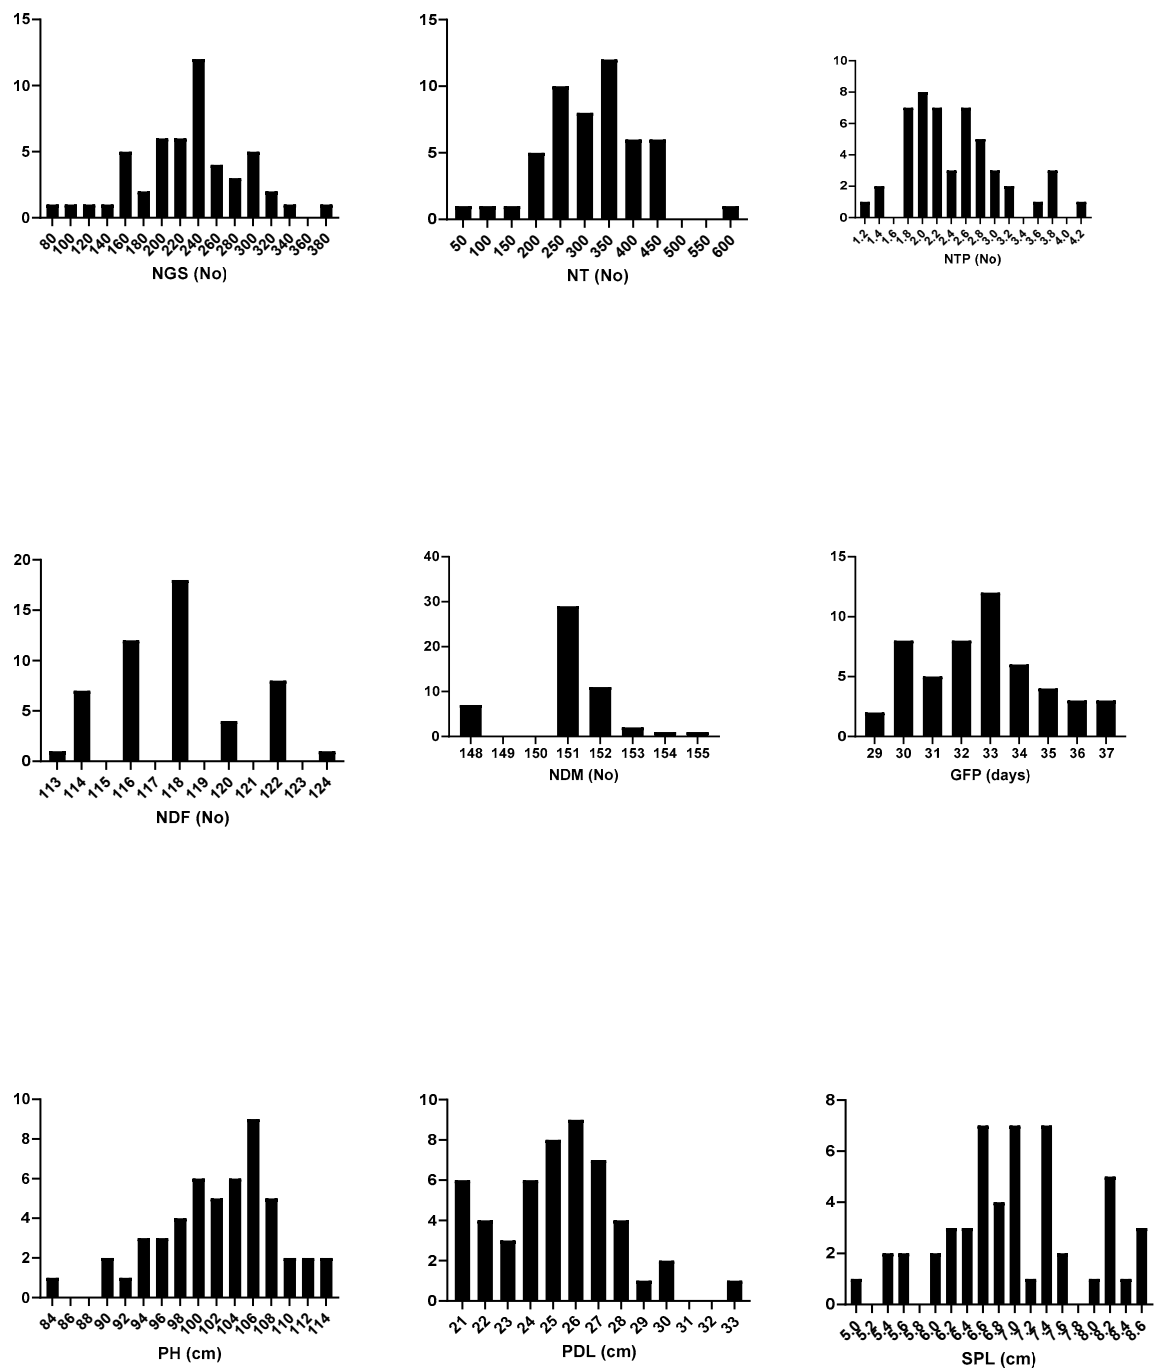

Figure S2. Frequency distribution of observed values of studied traits in F8 lines of wheat obtained from Gonbad  $\times$  Zagros in 2021

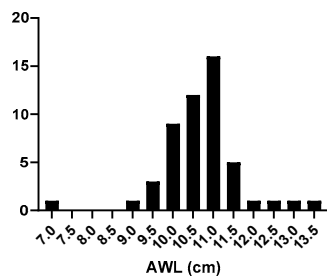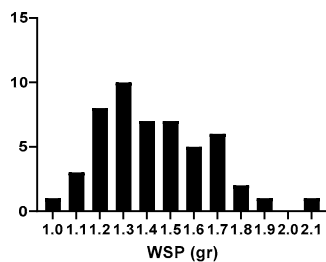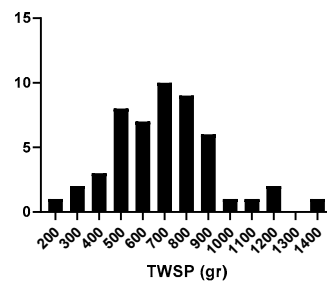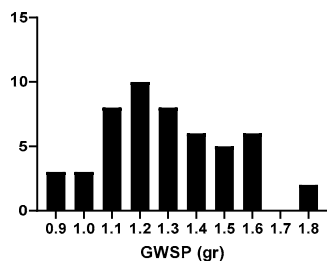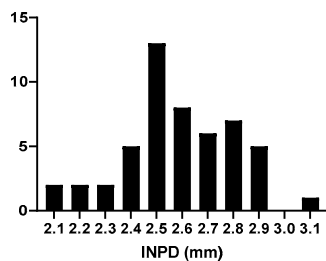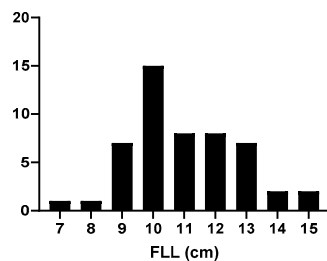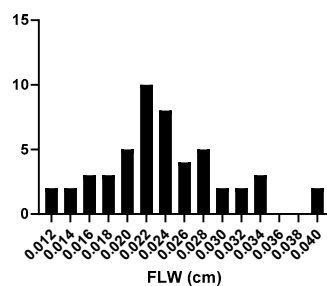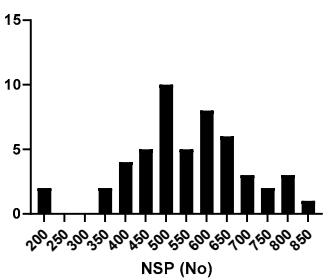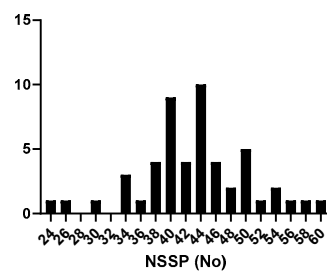

Continue Figure S2

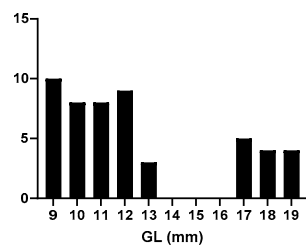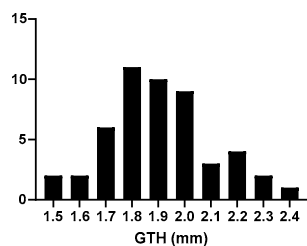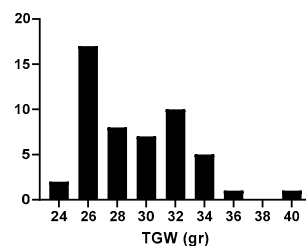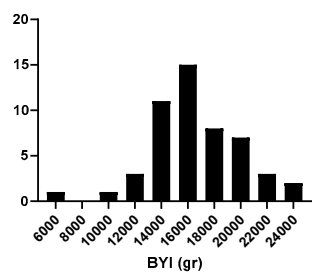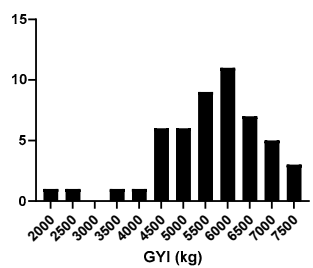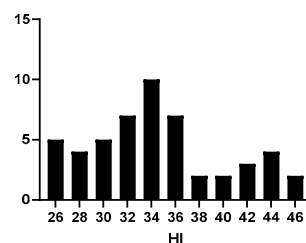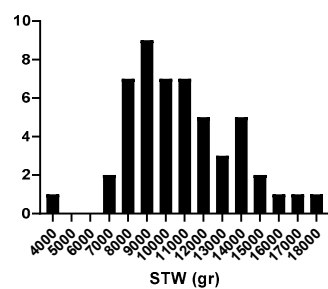

Continue Figure S2

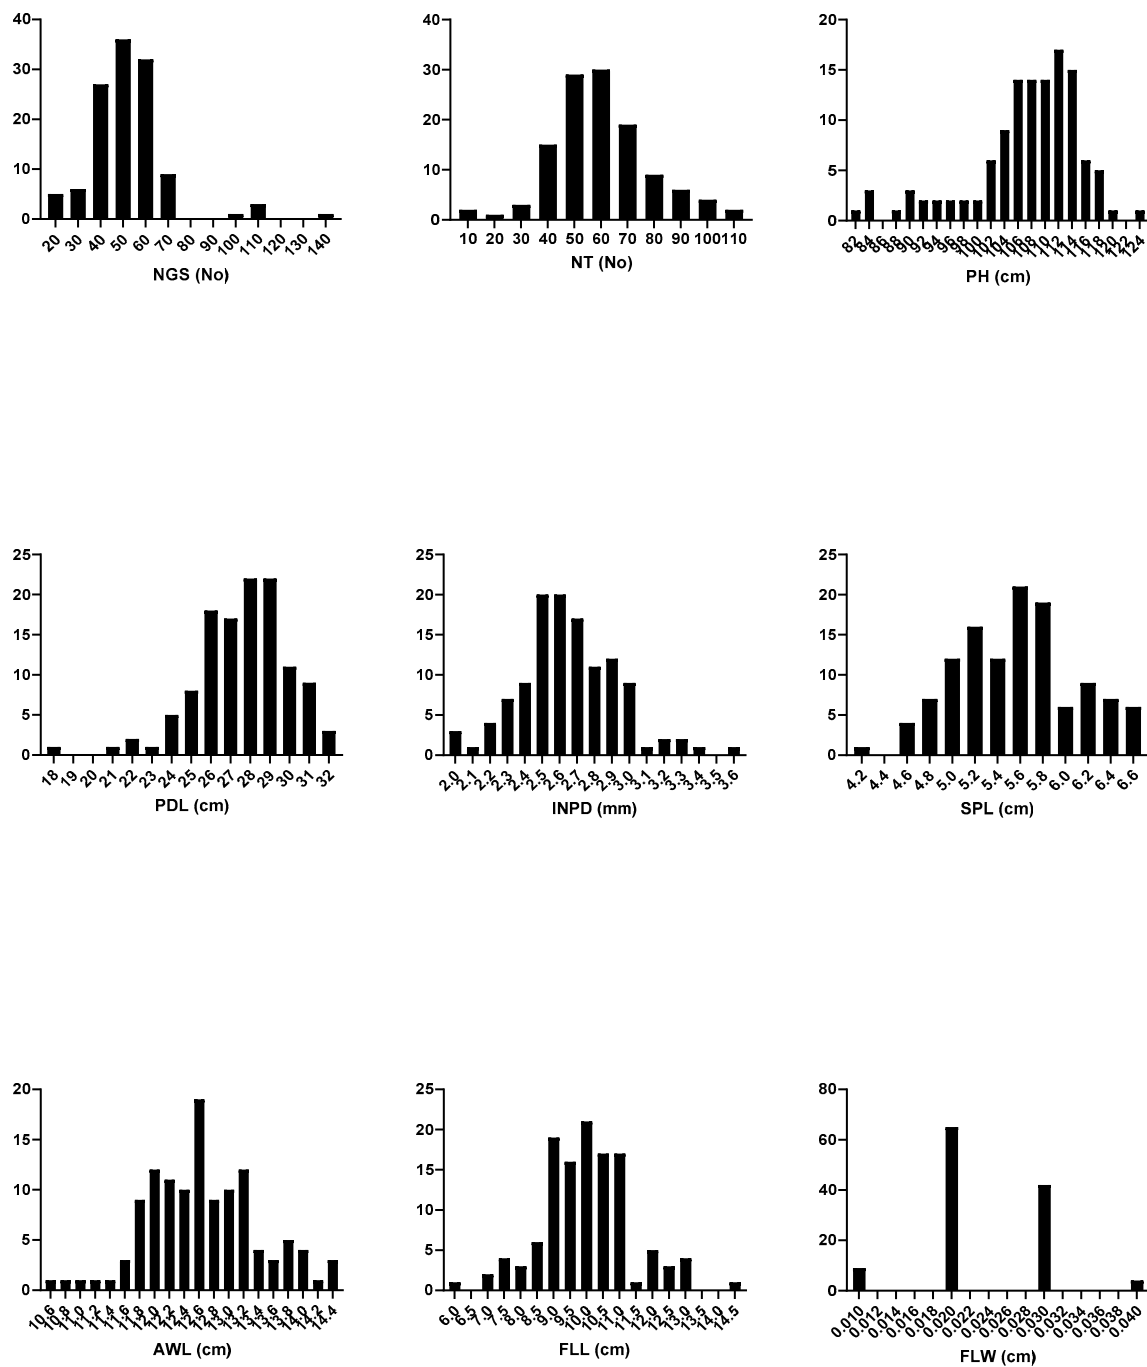

Figure S3. Frequency distribution of observed values of studied traits in F8 lines of wheat obtained from Gonbad  $\times$  Kohdasht in 2020

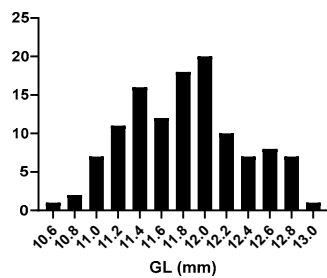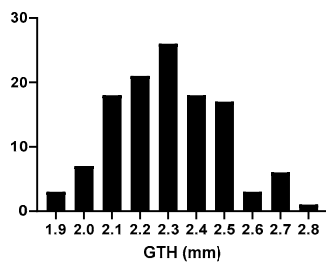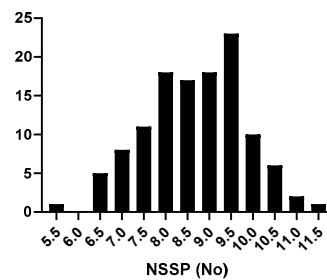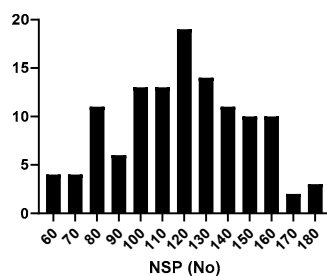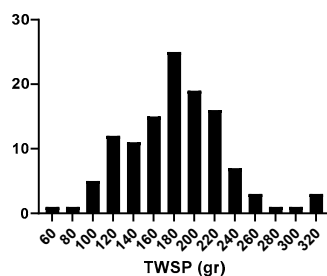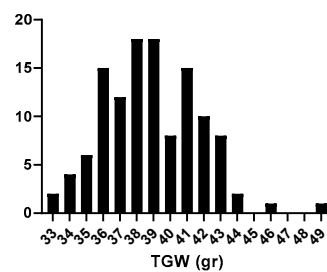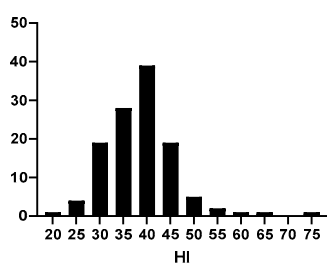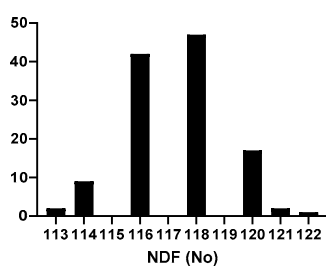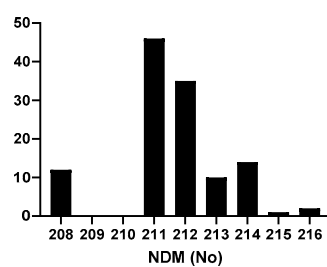

Continue Figure S3.



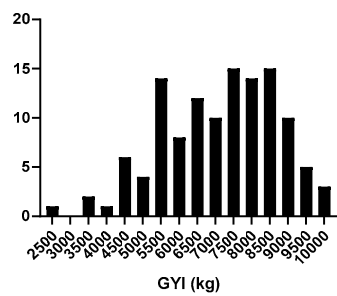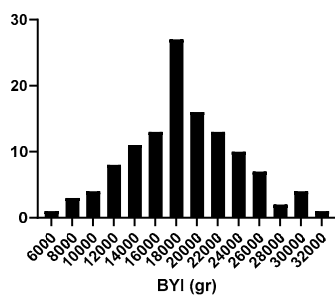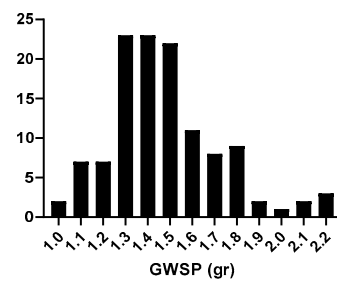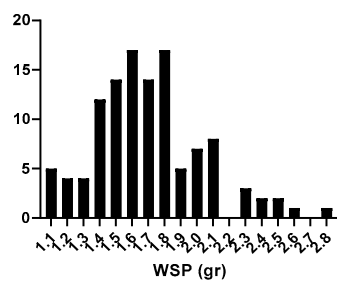

Continue Figure S3.

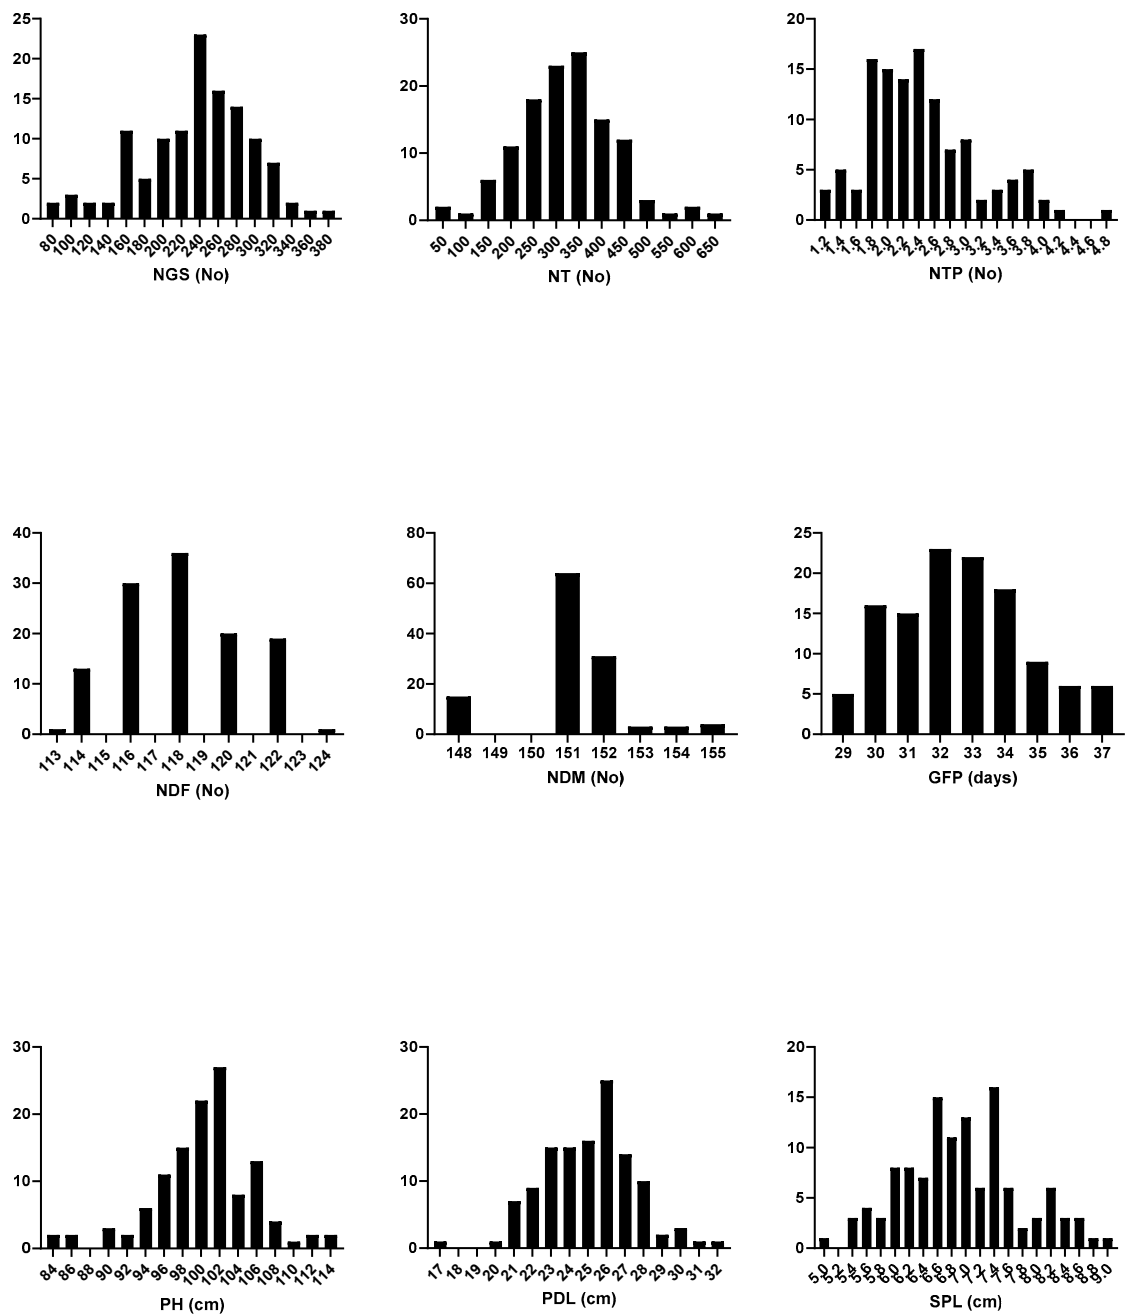

Figure S4. Frequency distribution of observed values of studied traits in F8 lines of wheat obtained from Gonbad  $\times$  Kohdasht in 2021

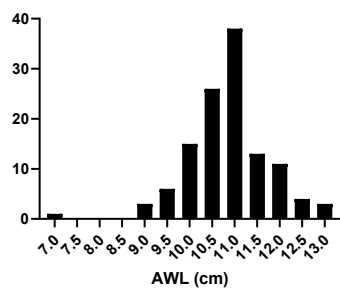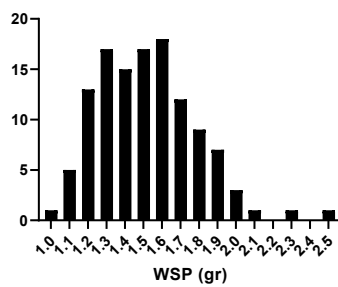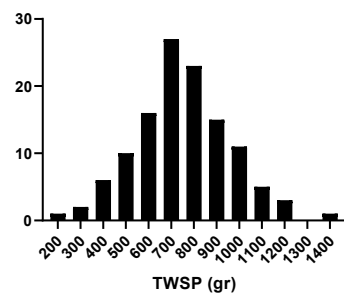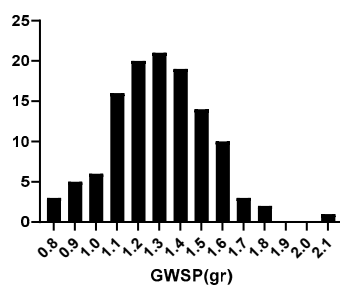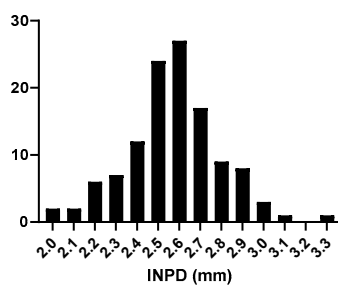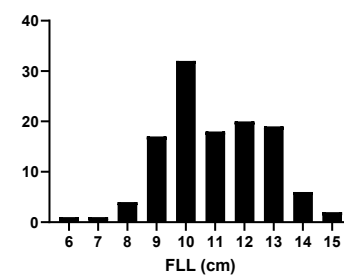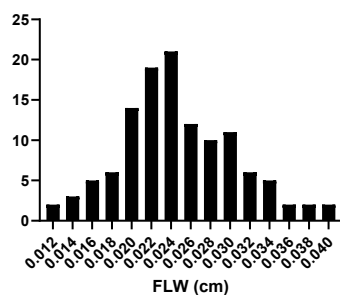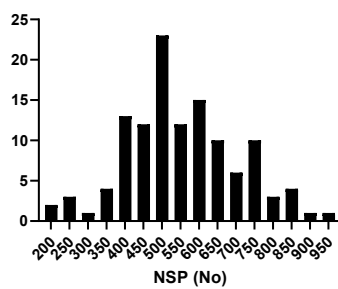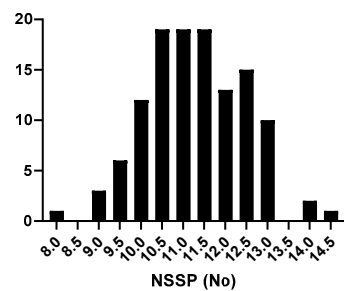

Continue Figure S4.

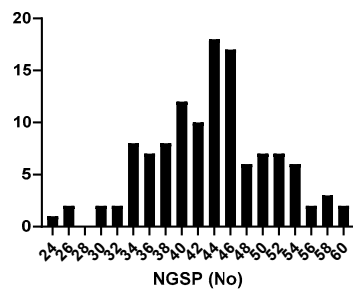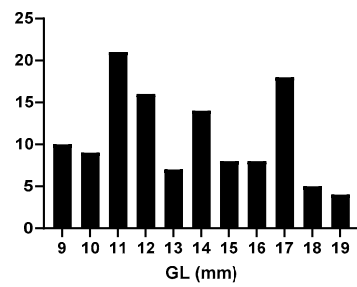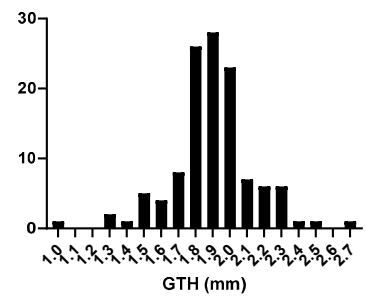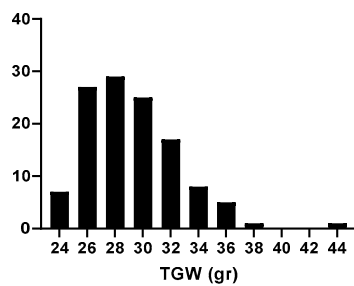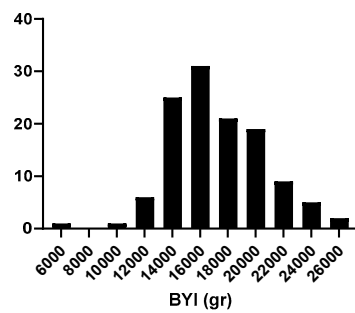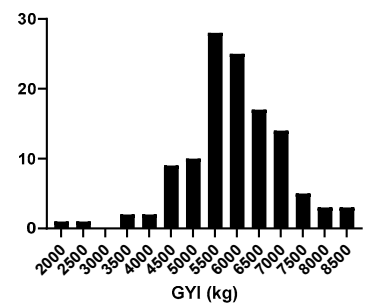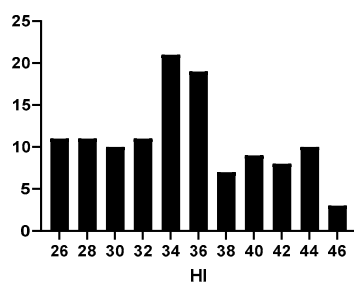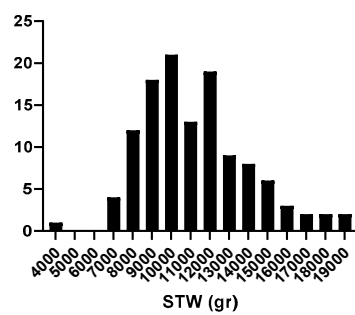

Continue Figure S4.
