# Supplementary material for: SSR Linkage Maps and Identification of QTL Controlling Morpho-Phenological Traits in Two Iranian Wheat RIL Populations
Source: MDPI journal article supplement (doi:10.3390/biotech11030032), 2022-08-08
Supplement: s1 [file s1]

**Table S1.** Meteorological statistics Gonbad Kavous Agricultural Research Station in 2020

| Month | rain (mm) | Min<br>absolute temperature | Max absolute tempe | Average temperature | Number of days below<br>zero | Relative humidity % | evaporation (mm) | Average min<br>temperature | Average max<br>temperature |
|-------|-----------|-----------------------------|--------------------|---------------------|------------------------------|---------------------|------------------|----------------------------|----------------------------|
| Oct   | 22.9      | 7.7                         | 36                 | 22.3                | -                            | 61                  | 113.2            | 14.4                       | 30.3                       |
| Nov   | 56.4      | 1.7                         | 30.9               | 15.1                | -                            | 72                  | 48.3             | 8.6                        | 21.6                       |
| Dec   | 11.9      | -0.5                        | 16.8               | 11.8                | 1                            | 74                  | 38               | 5.4                        | 18.1                       |
| Jan   | 16.4      | -0.5                        | 28.8               | 10.4                | 1                            | 66                  | 43               | 3.8                        | 17.1                       |
| Feb   | 68.4      | -2.1                        | 31.7               | 9.9                 | 6                            | 64                  | 51.9             | 2.8                        | 17                         |
| Mar   | 65.9      | 0.4                         | 26.9               | 12.4                | -                            | 77                  | 46.1             | 5.8                        | 19                         |
| Apr   | 93.2      | 0                           | 30.3               | 13.7                | 1                            | 81                  | 51.4             | 8.2                        | 19.3                       |
| May   | 40.6      | 8.4                         | 36.1               | 19.6                | 0                            | 73                  | 99.5             | 12.9                       | 26.3                       |
| June  | 2.4       | 12.8                        | 46.9               | 27.6                | 0                            | 48                  | 225.4            | 18.7                       | 36.4                       |
| Total | 398       | -2.1                        | 46.9               | 17.2                | 9                            | 66.5                | 966              | 10.28                      | 23.77                      |

**Table S2.** Meteorological statistics Gonbad Kavous Agricultural Research Station in 2021

| Month | rain (mm) | Min<br>absolute<br>temperature | Max absolute<br>tempe | Average<br>temperature | Number of days<br>below zero | Relative %<br>humidity | evaporation (mm) | Average min<br>temperature | Average max<br>temperature |
|-------|-----------|--------------------------------|-----------------------|------------------------|------------------------------|------------------------|------------------|----------------------------|----------------------------|
| Oct   | 30.4      | 6.9                            | 32.4                  | 20.3                   | 0                            | 57                     | 112.12           | 13                         | 27.6                       |
| Nov   | 16.5      | 1.5                            | 37.2                  | 16.5                   | 0                            | 66                     | 70.1             | 10.1                       | 23                         |
| Dec   | 31.9      | -4                             | 20                    | 8.9                    | 4                            | 78                     | 24.8             | 4.2                        | 13.6                       |
| Jan   | 31.8      | -3.1                           | 29.6                  | 8.3                    | 9                            | 72                     | 40.2             | 1.9                        | 14.7                       |
| Feb   | 24.5      | -3.9                           | 30.1                  | 10.2                   | 6                            | 71                     | 47.1             | 2.9                        | 17.6                       |
| Mar   | 62.2      | -5.7                           | 35.9                  | 9.1                    | 11                           | 73                     | 43.6             | 2.7                        | 15.5                       |
| Apr   | 16.6      | 2.6                            | 34.3                  | 16.6                   | 0                            | 67                     | 99.1             | 9.5                        | 23.6                       |
| May   | 20        | 12.2                           | 43.8                  | 22.3                   | 0                            | 62                     | 149              | 14.9                       | 29.8                       |
| June  | 12.2      | 14.8                           | 46.5                  | 28.2                   | 0                            | 50                     | 225.9            | 20.1                       | 36.3                       |
| Total | 246.1     | -5.7                           | 46.5                  | 15.6                   | 30                           | 66.22                  | 716.8            | 8.81                       | 22.41                      |
